# Supplementary material
Source: PubMed Central journal article supplement (PMC3657363)
Supplement: ijcep0006-1103-f3.pdf [file ijcep0006-1103-f3.pdf]

## Cytokines in histiocytic intervillitis

**Supplementary Table 1.** Mean expression levels of inflammation-associated genes

| Official gene abbreviation | CHI (n = 5), median<br>28 weeks of gestation<br>(range 19-33) | VUE (n = 4), median<br>37 weeks of gestation<br>(range 35-39) | Control (n = 7), median<br>30 weeks of gestation<br>(range 20-38) | p < 0.05 (*)<br>p > 0.05 (n.s.) |
|----------------------------|---------------------------------------------------------------|---------------------------------------------------------------|-------------------------------------------------------------------|---------------------------------|
| BMP1                       | 0.94                                                          | 1.37                                                          | 0.53                                                              | n.s.                            |
| BMP2                       | 0.34                                                          | 0.20                                                          | 0.15                                                              | n.s.                            |
| BMP4                       | 0.48                                                          | 0.51                                                          | 0.45                                                              | n.s.                            |
| BMP6                       | Not detectable                                                | Not detectable                                                | 0.09                                                              | n.s.                            |
| BMP7                       | 0.64                                                          | 0.32                                                          | 0.30                                                              | n.s.                            |
| BMPR1B                     | 5.47                                                          | 5.52                                                          | 0.27                                                              | n.s.                            |
| BMPR2                      | 0.54                                                          | 0.61                                                          | 1.33                                                              | n.s.                            |
| CCL2                       | 0.12                                                          | 0.26                                                          | 0.07                                                              | n.s.                            |
| CCL3                       | 3.62                                                          | 3.93                                                          | 0.17                                                              | n.s.                            |
| CCL4                       | 0.10                                                          | 0.28                                                          | 0.01                                                              | n.s.                            |
| CCL5                       | 0.36                                                          | 0.95                                                          | 0.14                                                              | VUE versus controls*            |
| COL1A2                     | 0.70                                                          | 0.24                                                          | 0.39                                                              | n.s.                            |
| COL3A1                     | 4.43                                                          | 3.46                                                          | 9.26                                                              | n.s.                            |
| COL4A1                     | 1.15                                                          | 0.71                                                          | 0.97                                                              | n.s.                            |
| CSF3                       | 0.02                                                          | Not detectable                                                | Not detectable                                                    | n.s.                            |
| CXCL9                      | 6.15                                                          | 18.09                                                         | 1.37                                                              | VUE versus controls*            |
| CXCL10                     | 0.59                                                          | 0.32                                                          | 0.04                                                              | n.s.                            |
| CXCL12                     | 0.08                                                          | 0.25                                                          | 0.02                                                              | VUE versus controls*            |
| CXCR1                      | 0.01                                                          | Not detectable                                                | 0.08                                                              | n.s.                            |
| CXCR2                      | 0.11                                                          | 0.02                                                          | 0.05                                                              | n.s.                            |
| CXCR4                      | 0.26                                                          | 0.28                                                          | 1.38                                                              | n.s.                            |
| EDN1                       | 0.28                                                          | 0.25                                                          | 0.13                                                              | n.s.                            |
| FGF1                       | 0.03                                                          | 0.00                                                          | 0.02                                                              | n.s.                            |
| FGF2                       | 0.02                                                          | 0.01                                                          | 0.05                                                              | n.s.                            |
| FOXP3                      | 0.05                                                          | 0.13                                                          | Not detectable                                                    | n.s.                            |
| HGF                        | 2.87                                                          | 1.58                                                          | 2.84                                                              | n.s.                            |
| IGF1                       | 0.11                                                          | 0.40                                                          | 0.11                                                              | n.s.                            |
| IL1B                       | 0.03                                                          | 0.01                                                          |                                                                   | n.s.                            |
| IL2RA                      | 0.15                                                          | 0.61                                                          | 0.26                                                              | n.s.                            |
| IL3                        | Not detectable                                                | Not detectable                                                | Not detectable                                                    | n.s.                            |
| IL4                        | Not detectable                                                | Not detectable                                                | Not detectable                                                    | n.s.                            |
| IL6                        | 0.07                                                          | 0.09                                                          | 0.13                                                              | n.s.                            |
| IL8                        | 0.28                                                          | 0.19                                                          | 0.83                                                              | n.s.                            |
| IL12A                      | 0.00                                                          | 0.00                                                          | Not detectable                                                    | n.s.                            |
| IL13                       | Not detectable                                                | Not detectable                                                | Not detectable                                                    | n.s.                            |
| IL15                       | 0.00                                                          | Not detectable                                                | Not detectable                                                    | n.s.                            |
| IL17A                      | Not detectable                                                | Not detectable                                                | Not detectable                                                    | n.s.                            |
| LIF                        | 0.05                                                          | 0.12                                                          | 0.14                                                              | n.s.                            |
| LOX                        | 0.37                                                          | 0.29                                                          | 0.23                                                              | n.s.                            |
| MMP1                       | 0.20                                                          | 0.02                                                          | 0.02                                                              | n.s.                            |
| MMP2                       | 0.79                                                          | 0.36                                                          | 0.80                                                              | n.s.                            |
| MMP9                       | 1.32                                                          | 0.37                                                          | 0.12                                                              | CHI versus controls*            |
| MMP11                      | 1.73                                                          | 3.64                                                          | 2.60                                                              | n.s.                            |
| MMP13                      | Not detectable                                                | Not detectable                                                | Not detectable                                                    | n.s.                            |
| MMP14                      | 1.96                                                          | 0.73                                                          | 1.45                                                              | VUE versus CHI*                 |

## Cytokines in histiocytic intervillitis

|          |                |                |                |                      |
|----------|----------------|----------------|----------------|----------------------|
| NOG      | 0.04           | 0.21           | 2.54           | n.s.                 |
| PDGFA    | 0.18           | 0.52           | 0.41           | n.s.                 |
| PLAT     | 0.46           | 0.28           | 0.23           | n.s.                 |
| PLAUR    | 1.92           | 2.14           | 1.96           | n.s.                 |
| PLOD2    | 0.03           | Not detectable | 0.49           | n.s.                 |
| PTK2     | 1.67           | 0.67           | 0.43           | n.s.                 |
| SERPINE1 | 3.32           | 3.53           | 4.38           | n.s.                 |
| SMAD1    | 0.08           | 0.08           | 0.29           | n.s.                 |
| SMAD3    | 0.47           | 0.29           | 0.41           | n.s.                 |
| SMAD4    | 0.61           | 0.71           | 0.20           | n.s.                 |
| SMAD5    | 0.15           | 0.13           | 0.07           | n.s.                 |
| TGFB1    | 6.08           | 6.57           | 4.33           | n.s.                 |
| TGFB2    | 0.35           | Not detectable | 0.03           | n.s.                 |
| TGFB3    | 0.15           | 0.04           | 0.53           | n.s.                 |
| TGFBR1   | 1.01           | 0.29           | 0.17           | CHI versus controls* |
| TGFBR2   | 0.52           | 0.61           | 0.62           | n.s.                 |
| THBS1    | 6.70           | 8.08           | 6.15           | n.s.                 |
| THPO     | Not detectable | Not detectable | Not detectable | n.s.                 |
| TIMP1    | 6.30           | 16.02          | 4.90           | VUE versus controls* |
| TIMP2    | 2.29           | 2.03           | 2.05           | n.s.                 |
| TNF      | 0.02           | Not detectable | Not detectable | n.s.                 |
| VEGFA    | 0.16           | 0.31           | 1.88           | n.s.                 |

**Supplementary Table 2.** Mean expression levels of angiogenesis-associated genes

| Official gene abbreviation | CHI (n = 4), median 27.5 weeks of gestation (range 19-33) | Controls (n = 3), median 25 weeks of gestation (range 20-33) | p < 0.05 (*)<br>p > 0.05 (n.s.) |
|----------------------------|-----------------------------------------------------------|--------------------------------------------------------------|---------------------------------|
| ANGPT1                     | 0.02                                                      | 0.01                                                         | n.s.                            |
| ANGPT2                     | 0.04                                                      | 0.21                                                         | n.s.                            |
| ANGPTL1                    | 0.00                                                      | 0.01                                                         | n.s.                            |
| ANGPTL4                    | 0.09                                                      | 0.31                                                         | n.s.                            |
| BAI1                       | 0.13                                                      | 0.16                                                         | n.s.                            |
| CAV2                       | 0.25                                                      | 0.28                                                         | n.s.                            |
| CDK1                       | 0.01                                                      | 0.01                                                         | n.s.                            |
| CXCL1                      | 0.09                                                      | 0.09                                                         | n.s.                            |
| EPHB4                      | 0.18                                                      | 0.10                                                         | n.s.                            |
| FGFR1                      | 0.81                                                      | 0.94                                                         | n.s.                            |
| FIGF                       | Not detectable                                            | Not detectable                                               | n.s.                            |
| FLT1                       | 3.12                                                      | 1.57                                                         | n.s.                            |
| FLT4                       | 0.08                                                      | 0.00                                                         | n.s.                            |
| GREM1                      | Not detectable                                            | Not detectable                                               | n.s.                            |
| HIF1A                      | 1.26                                                      | 1.18                                                         | n.s.                            |
| KDR                        | 0.55                                                      | 0.50                                                         | n.s.                            |
| LECT1                      | Not detectable                                            | Not detectable                                               | n.s.                            |
| MDK                        | 0.03                                                      | 0.01                                                         | n.s.                            |
| NOS3                       | 0.16                                                      | 0.06                                                         | n.s.                            |
| NOTCH4                     | 0.20                                                      | 0.16                                                         | n.s.                            |
| NOX4                       | 0.02                                                      | Not detectable                                               | n.s.                            |
| NRP1                       | 0.10                                                      | 0.06                                                         | n.s.                            |

## Cytokines in histiocytic intervillositis

|         |      |                |      |
|---------|------|----------------|------|
| OLR1    | 0.22 | 0.13           | n.s. |
| PDGFRA  | 0.18 | 0.08           | n.s. |
| PDPN    | 2.05 | 2.22           | n.s. |
| PECAM1  | 3.57 | 3.13           | n.s. |
| PTGS1   | 0.02 | 0.00           | n.s. |
| PTRF    | 1.30 | 1.20           | n.s. |
| S1PR1   | 0.13 | 0.03           | n.s. |
| STAB1   | 0.40 | 0.24           | n.s. |
| TEK     | 0.32 | 0.16           | n.s. |
| TNFAIP2 | 0.01 | Not detectable | n.s. |
| TYMP    | 0.14 | 0.02           | n.s. |
| VCAM1   | 0.23 | 0.34           | n.s. |
| VEGFC   | 0.18 | 0.10           | n.s. |

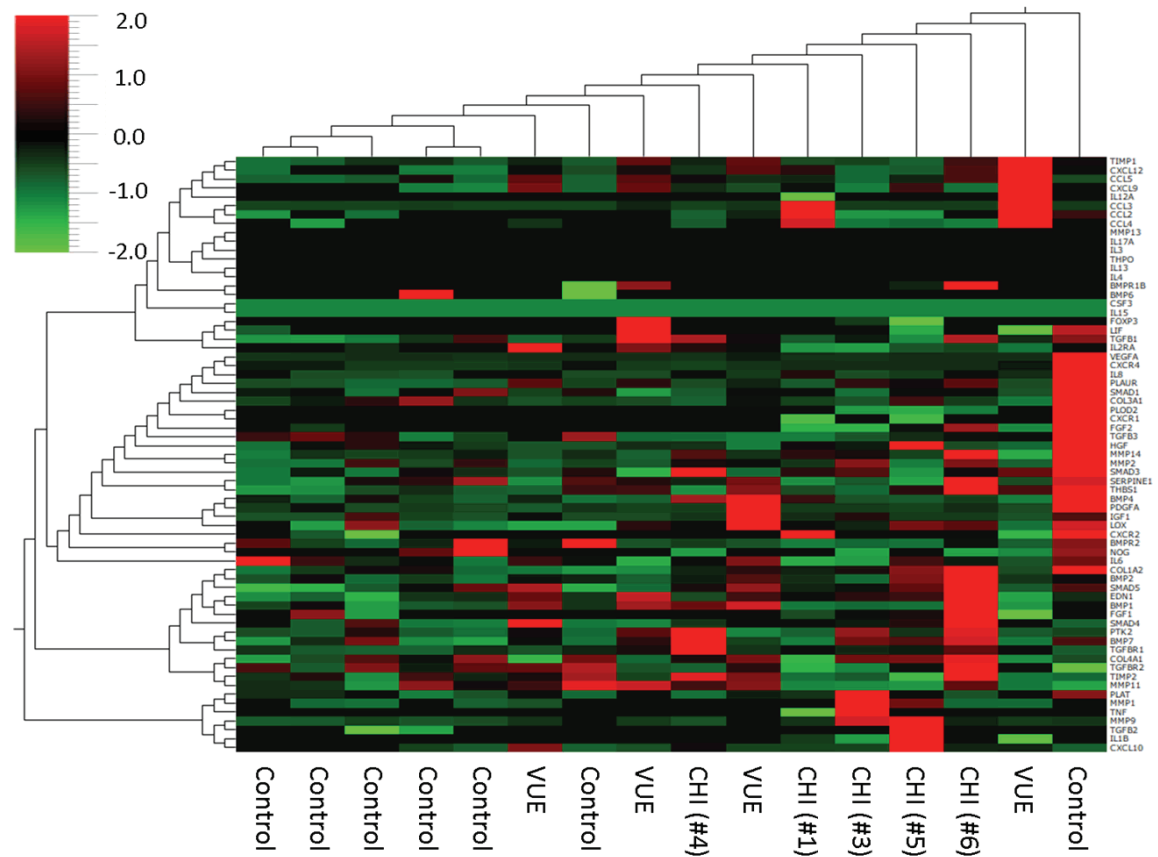

**Supplementary Figure 1.** Cluster analysis of the inflammation-associated gene expression profile in CHI, VUE and normal placenta.
